# Supplementary material for: Integration of single cell omics with biobank data discovers trans effects of SREBF1 abdominal obesity risk variants on adipocyte expression of more than 100 genes
Source: bioRxiv or medRxiv preprint supplement (doi:10.1101/2024.11.22.24317804), 2024-11-23

**1** Generate, integrate, and cluster VAT and SAT gene expression at the cell-type level in the KOBIS cohort

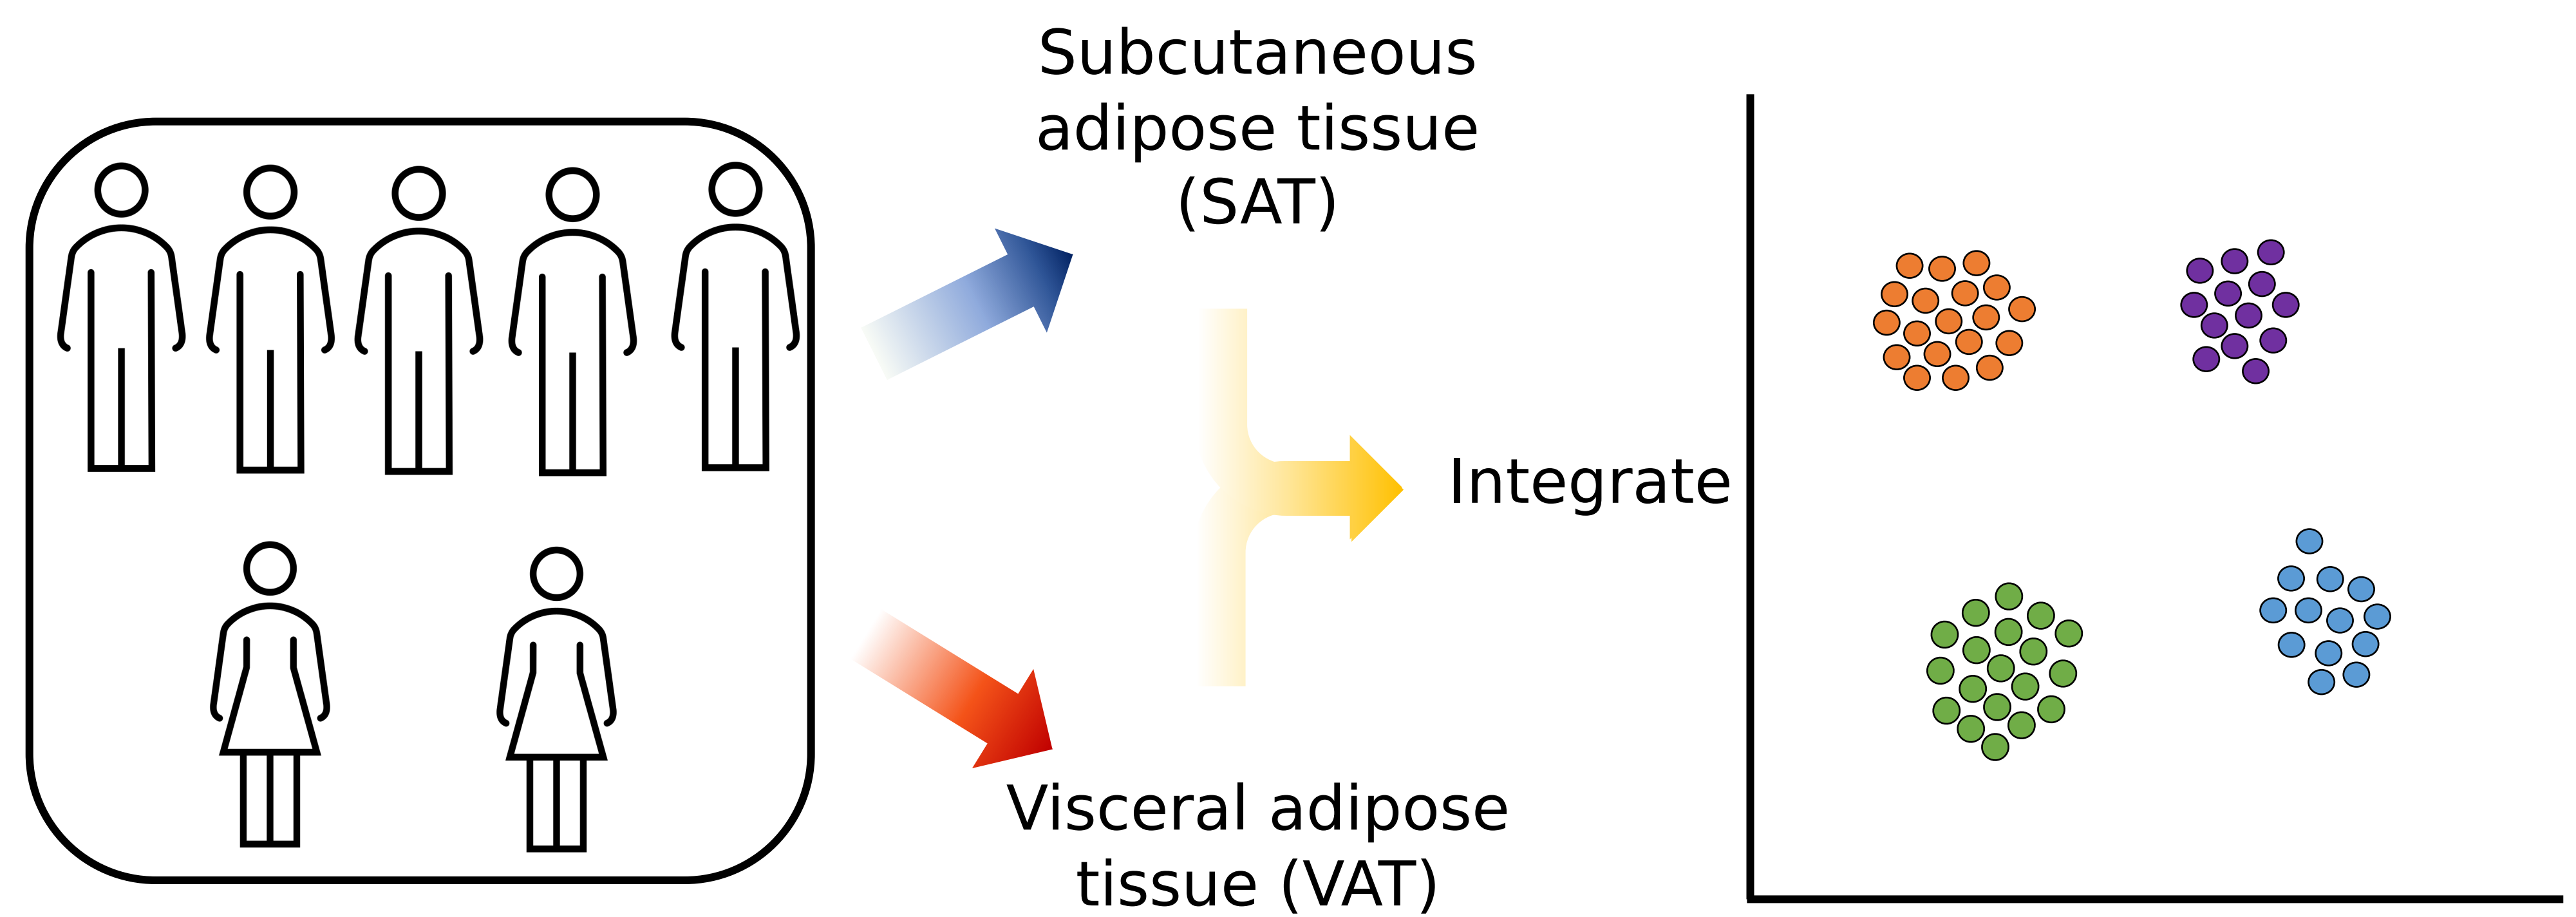

**2** Identification of marker genes specific to SAT (MGSS), VAT (MGSV), and shared between the tissues (MGSBT)

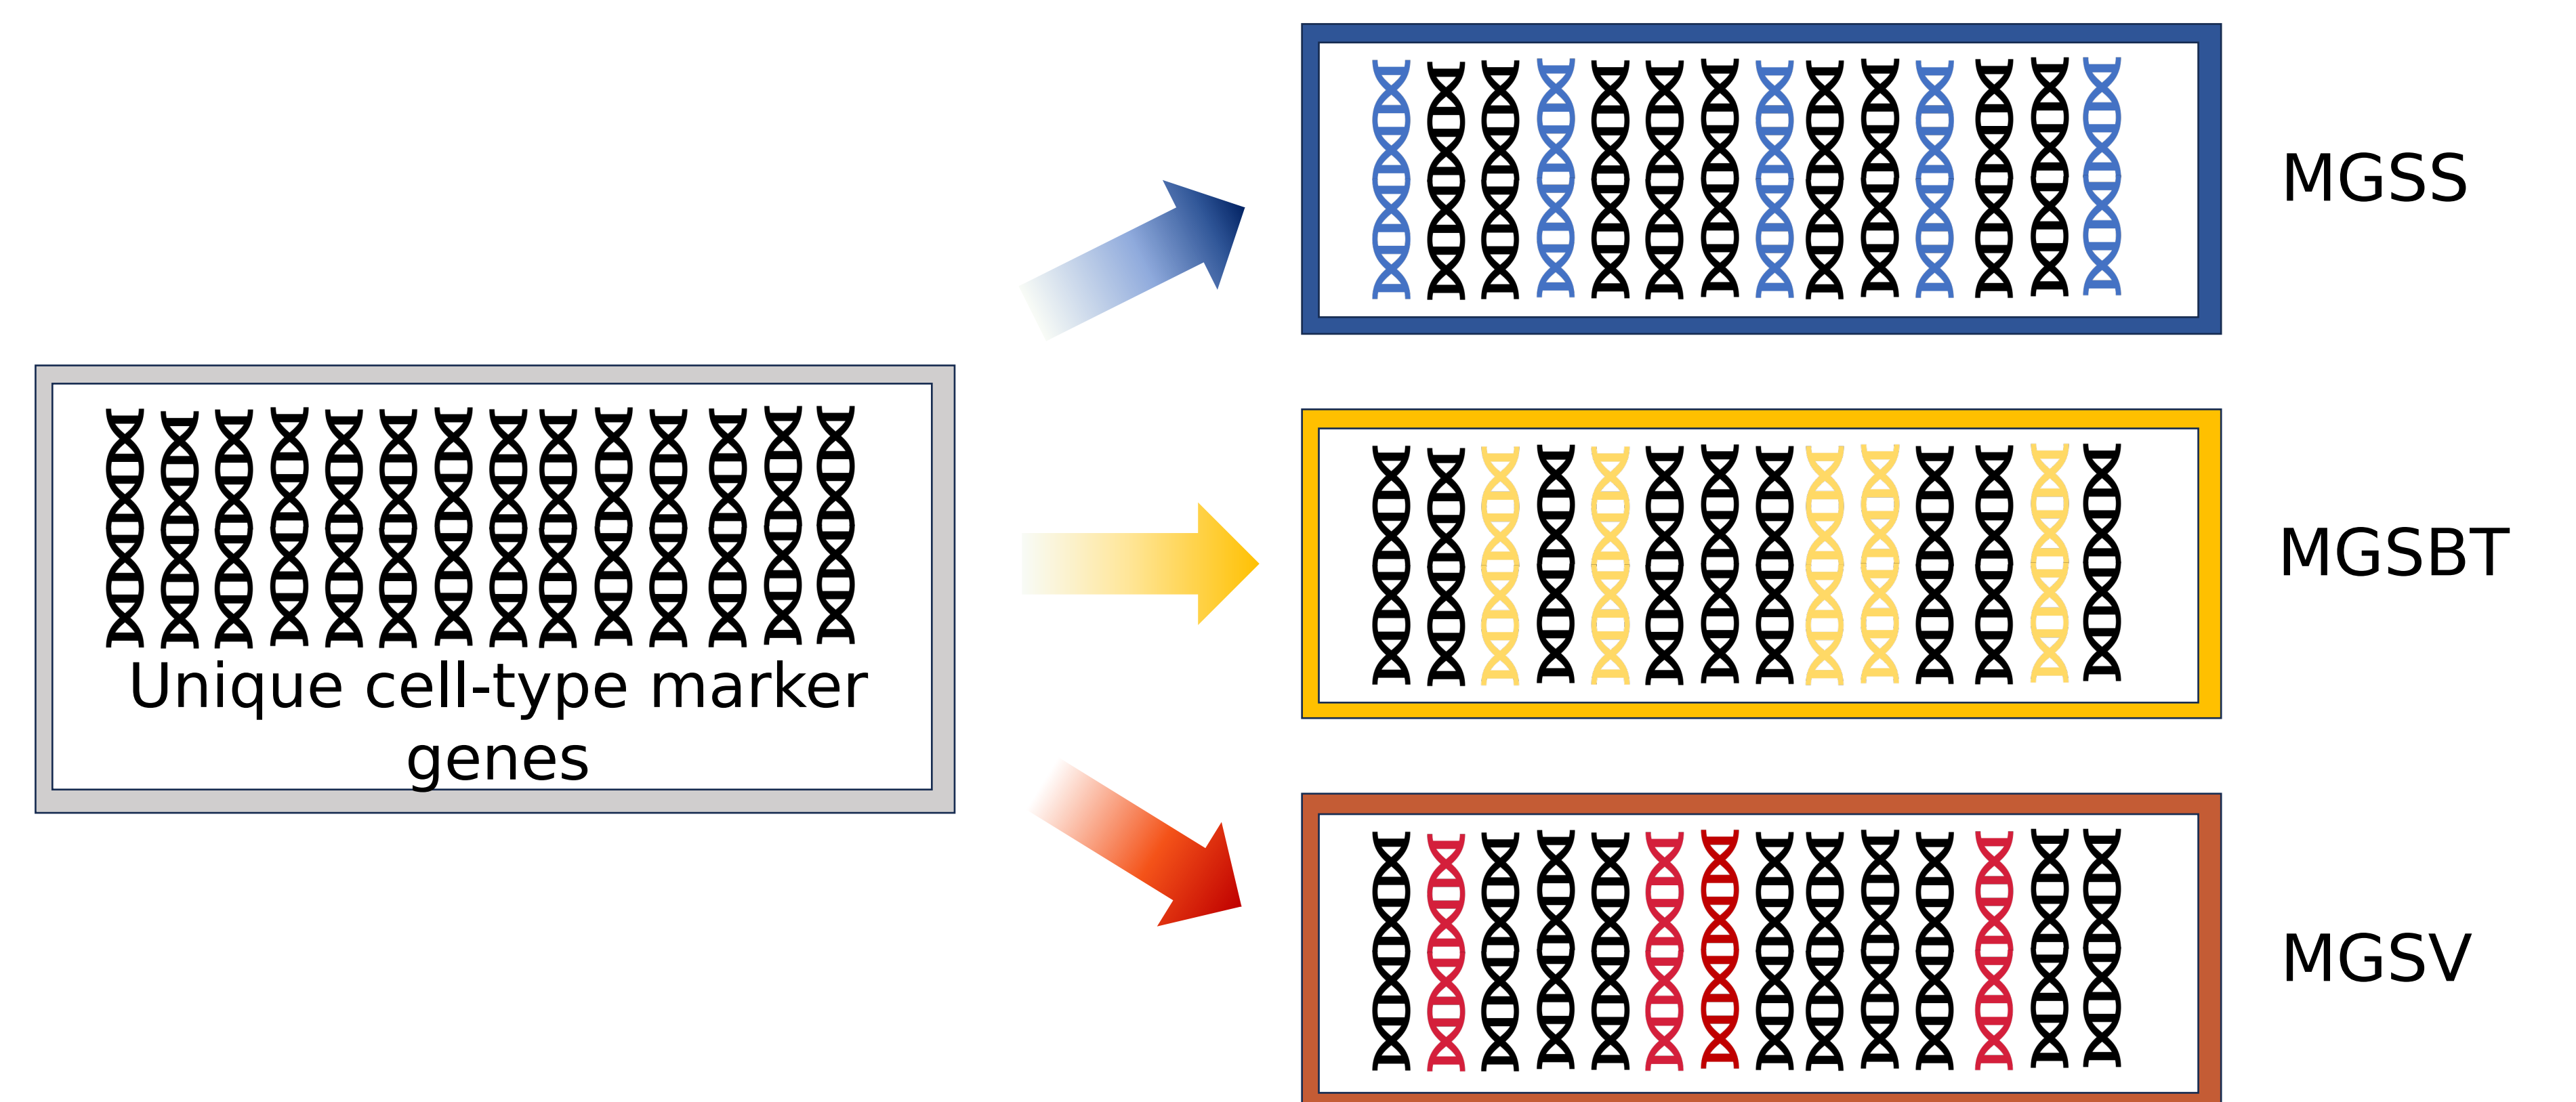

**3** Determine variance explained of abdominal obesity using regional PRSs of marker genes

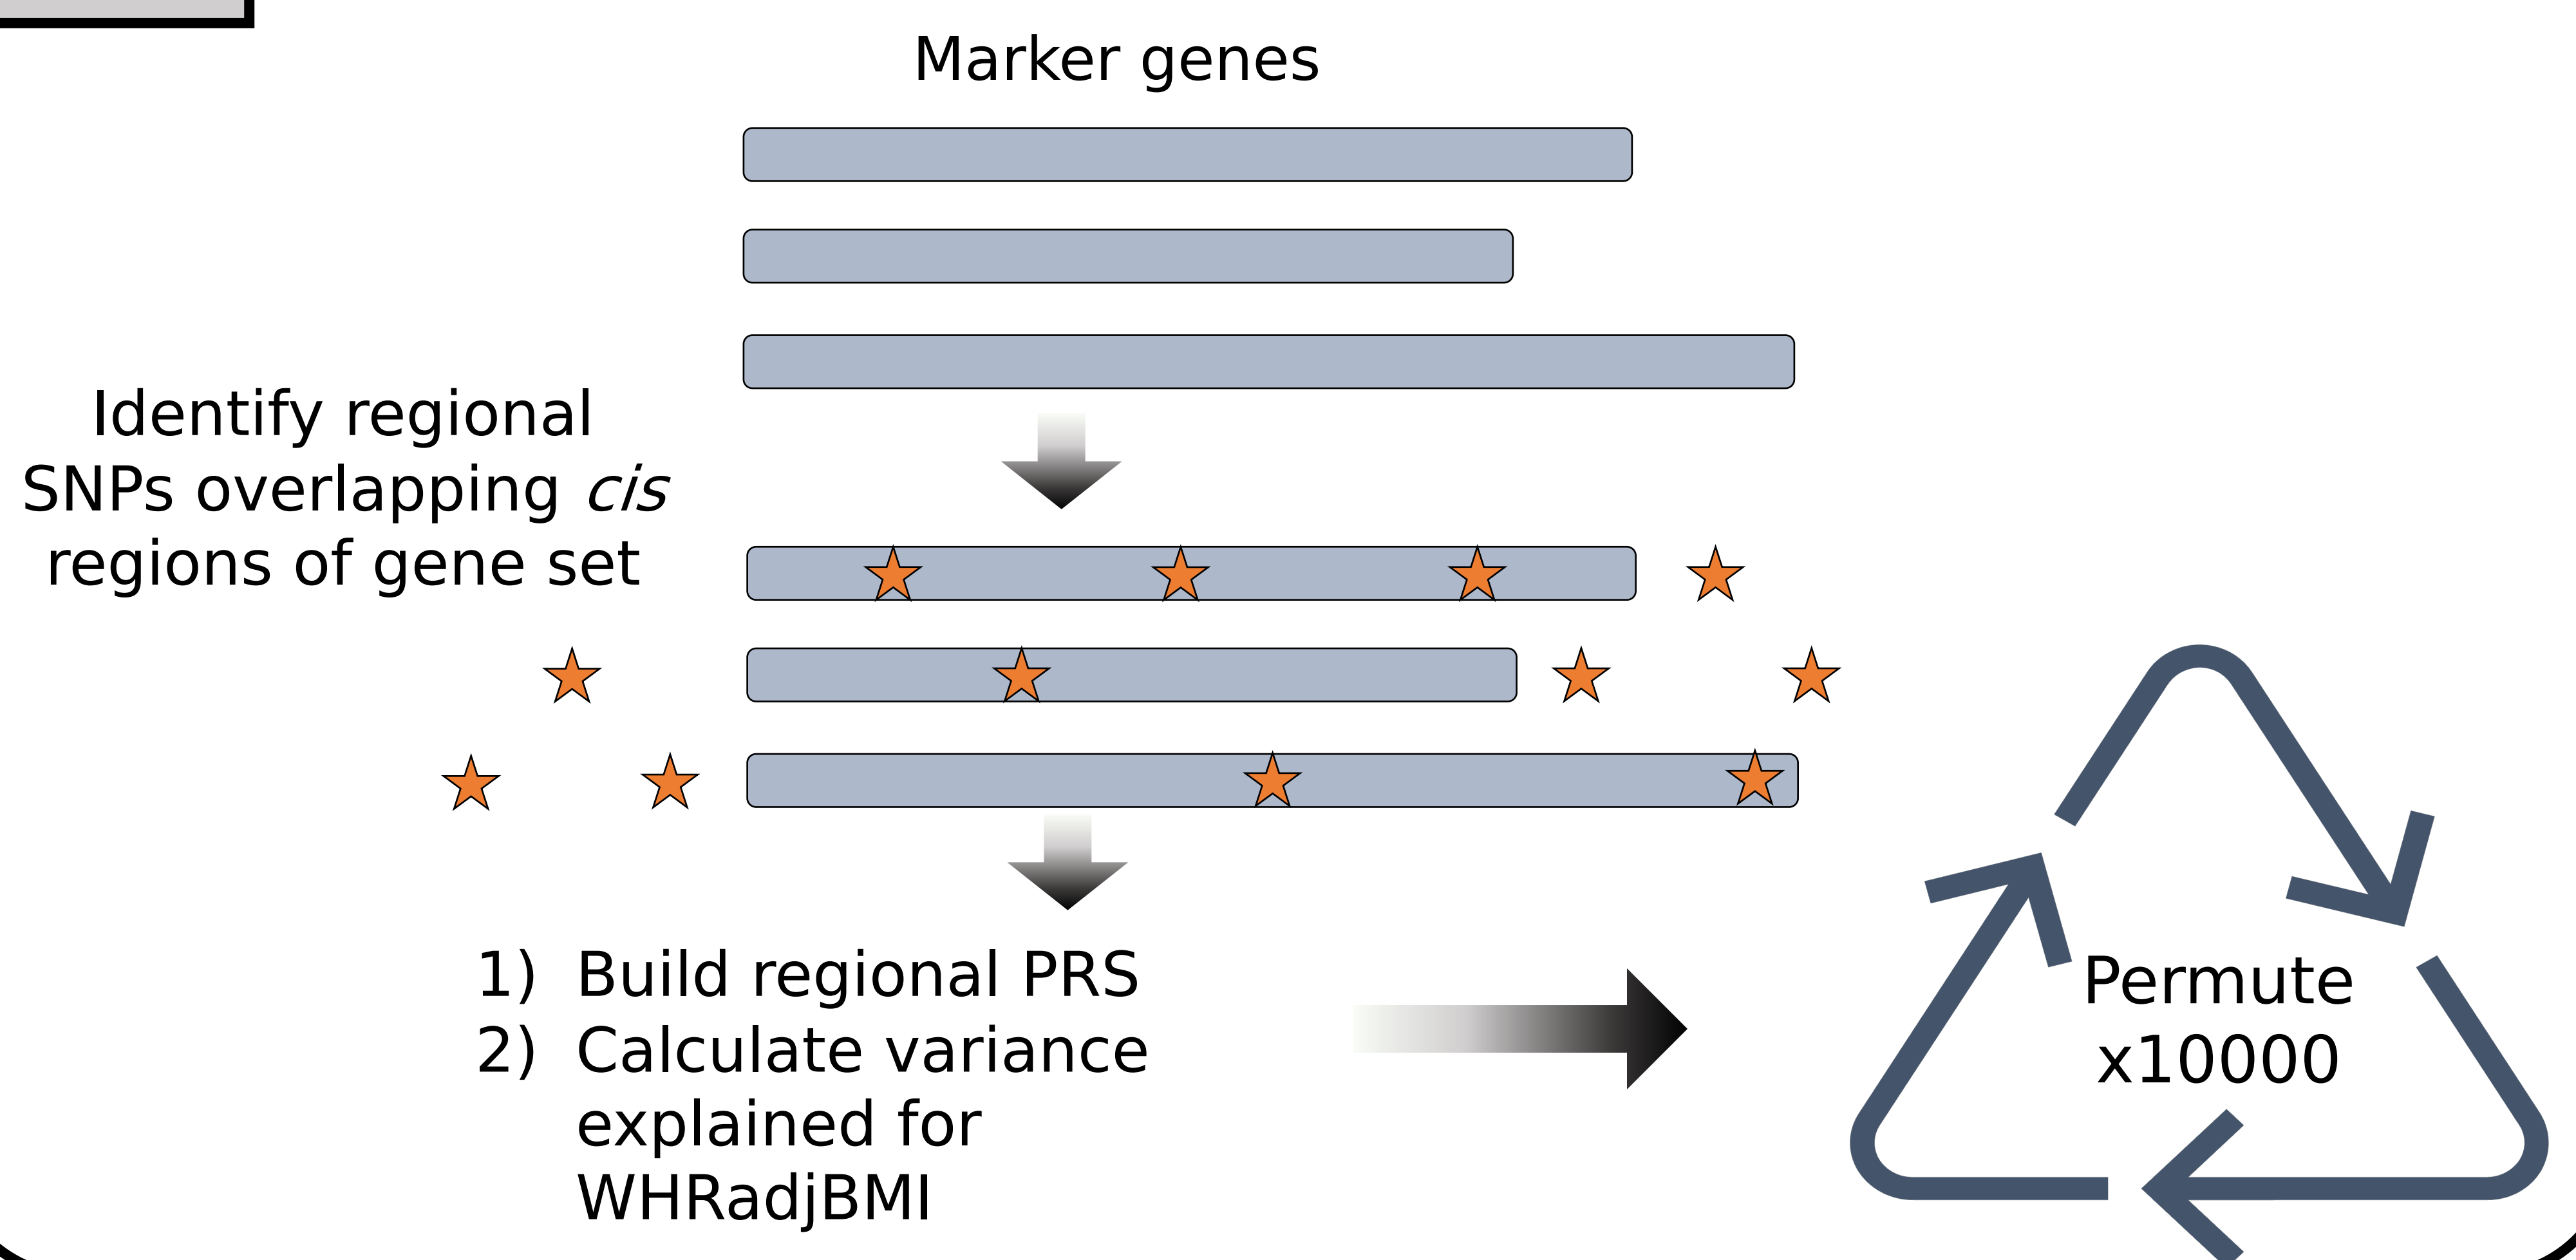

**4** Identification of functional cell-type and tissue-specific marker genes through pathway enrichment

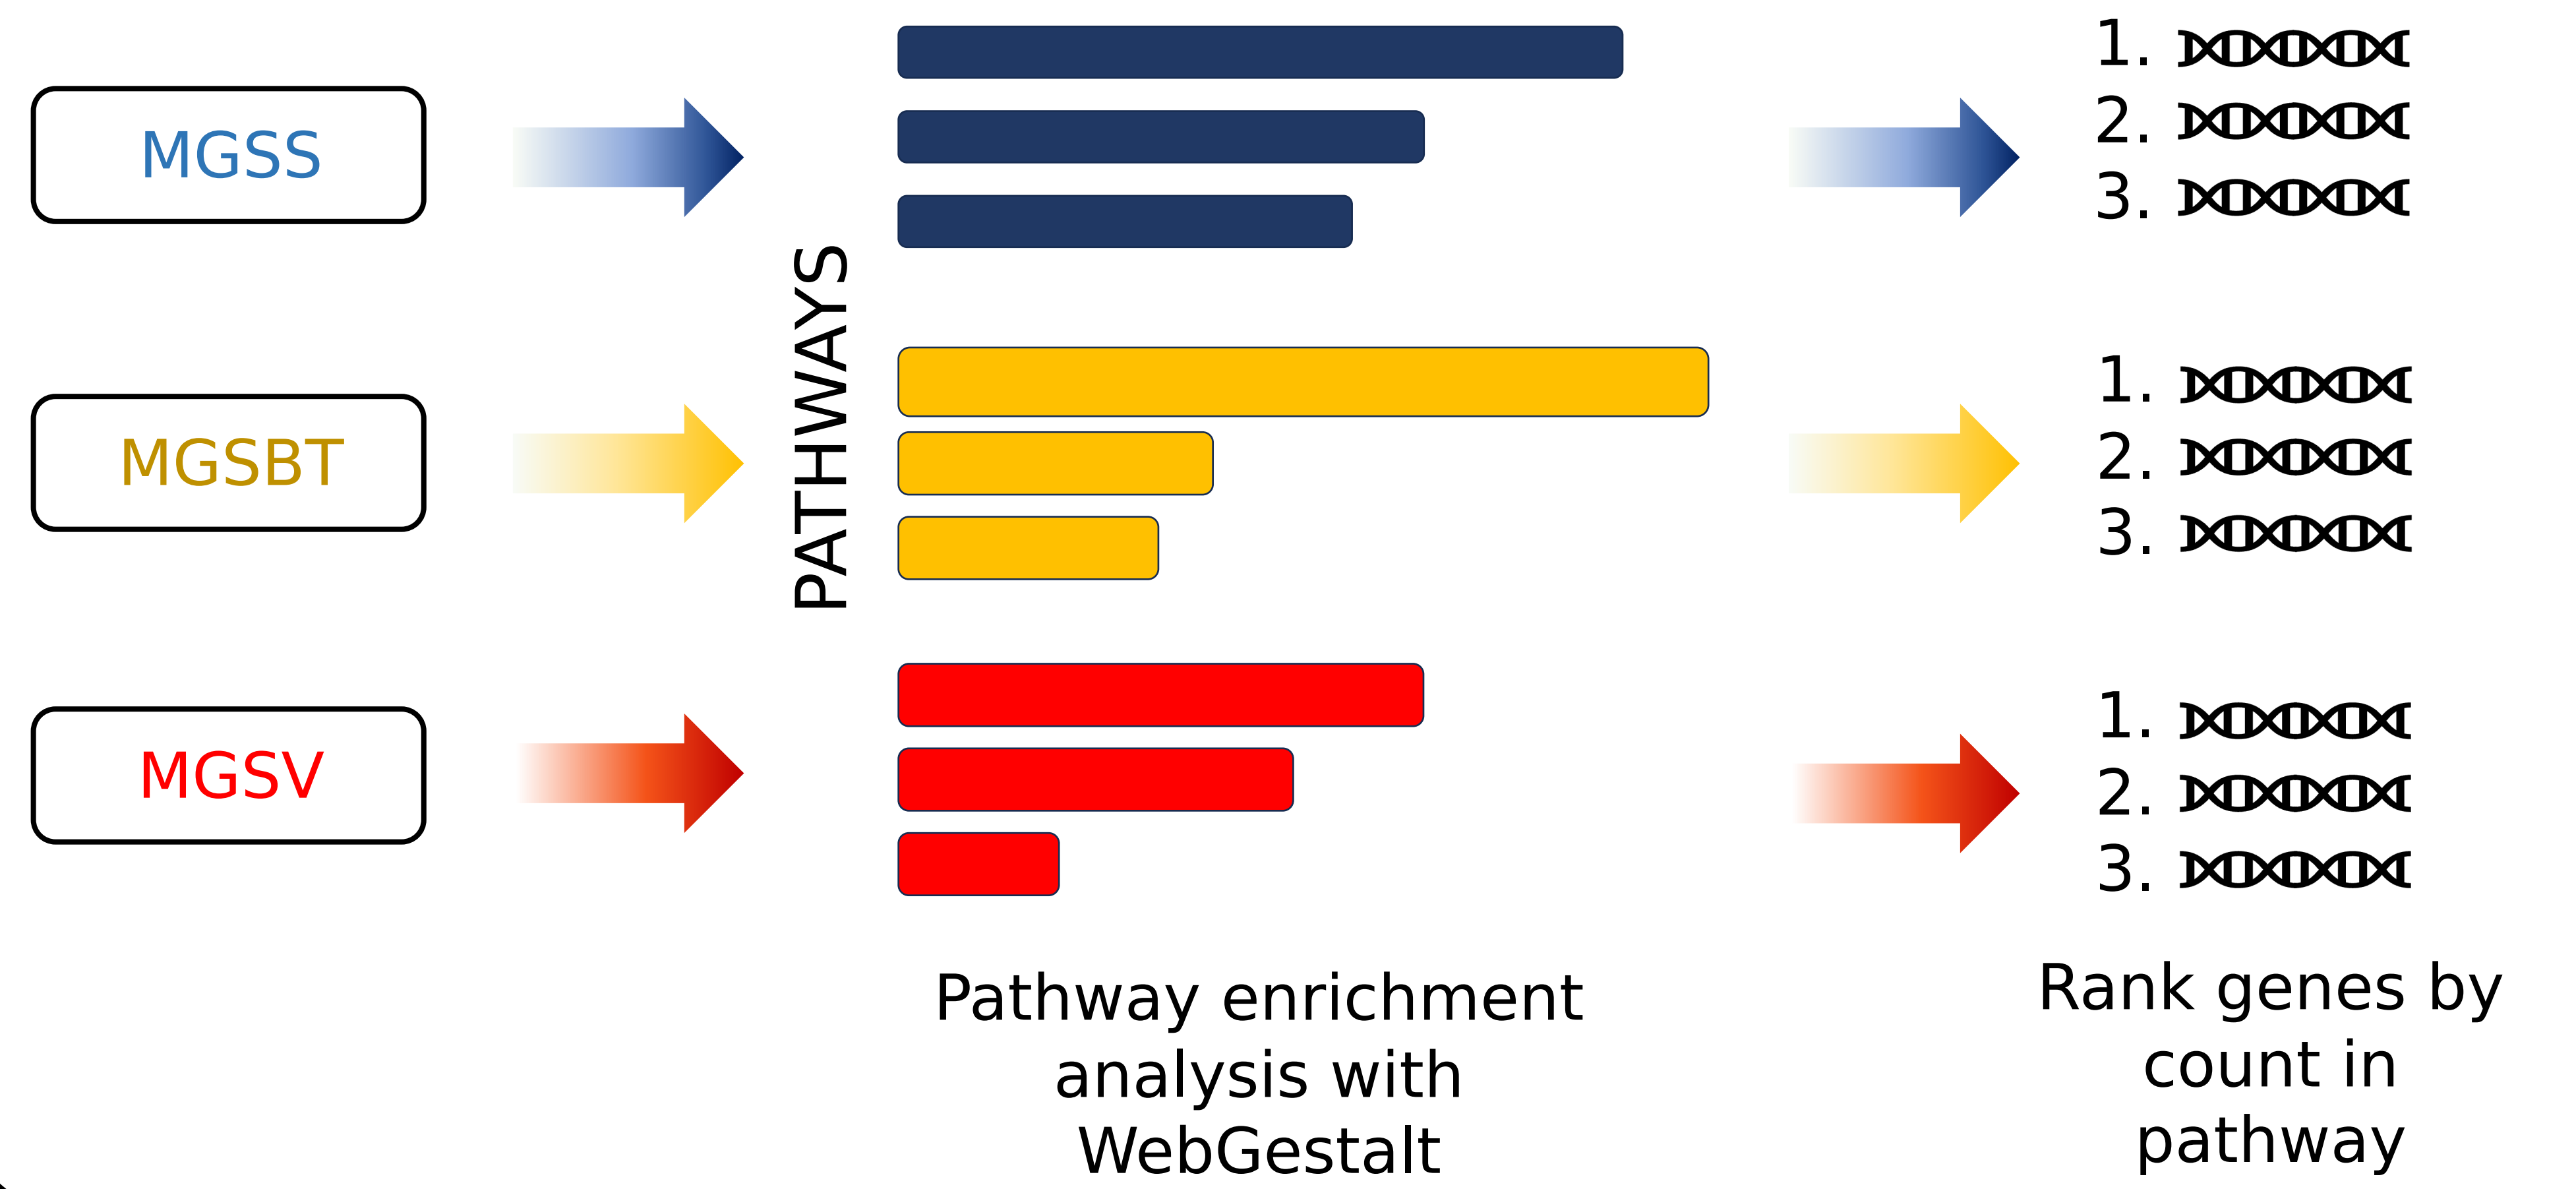

**5** Analysis of longitudinal differential expression and temporal co-expression across 6 time points of adipogenesis

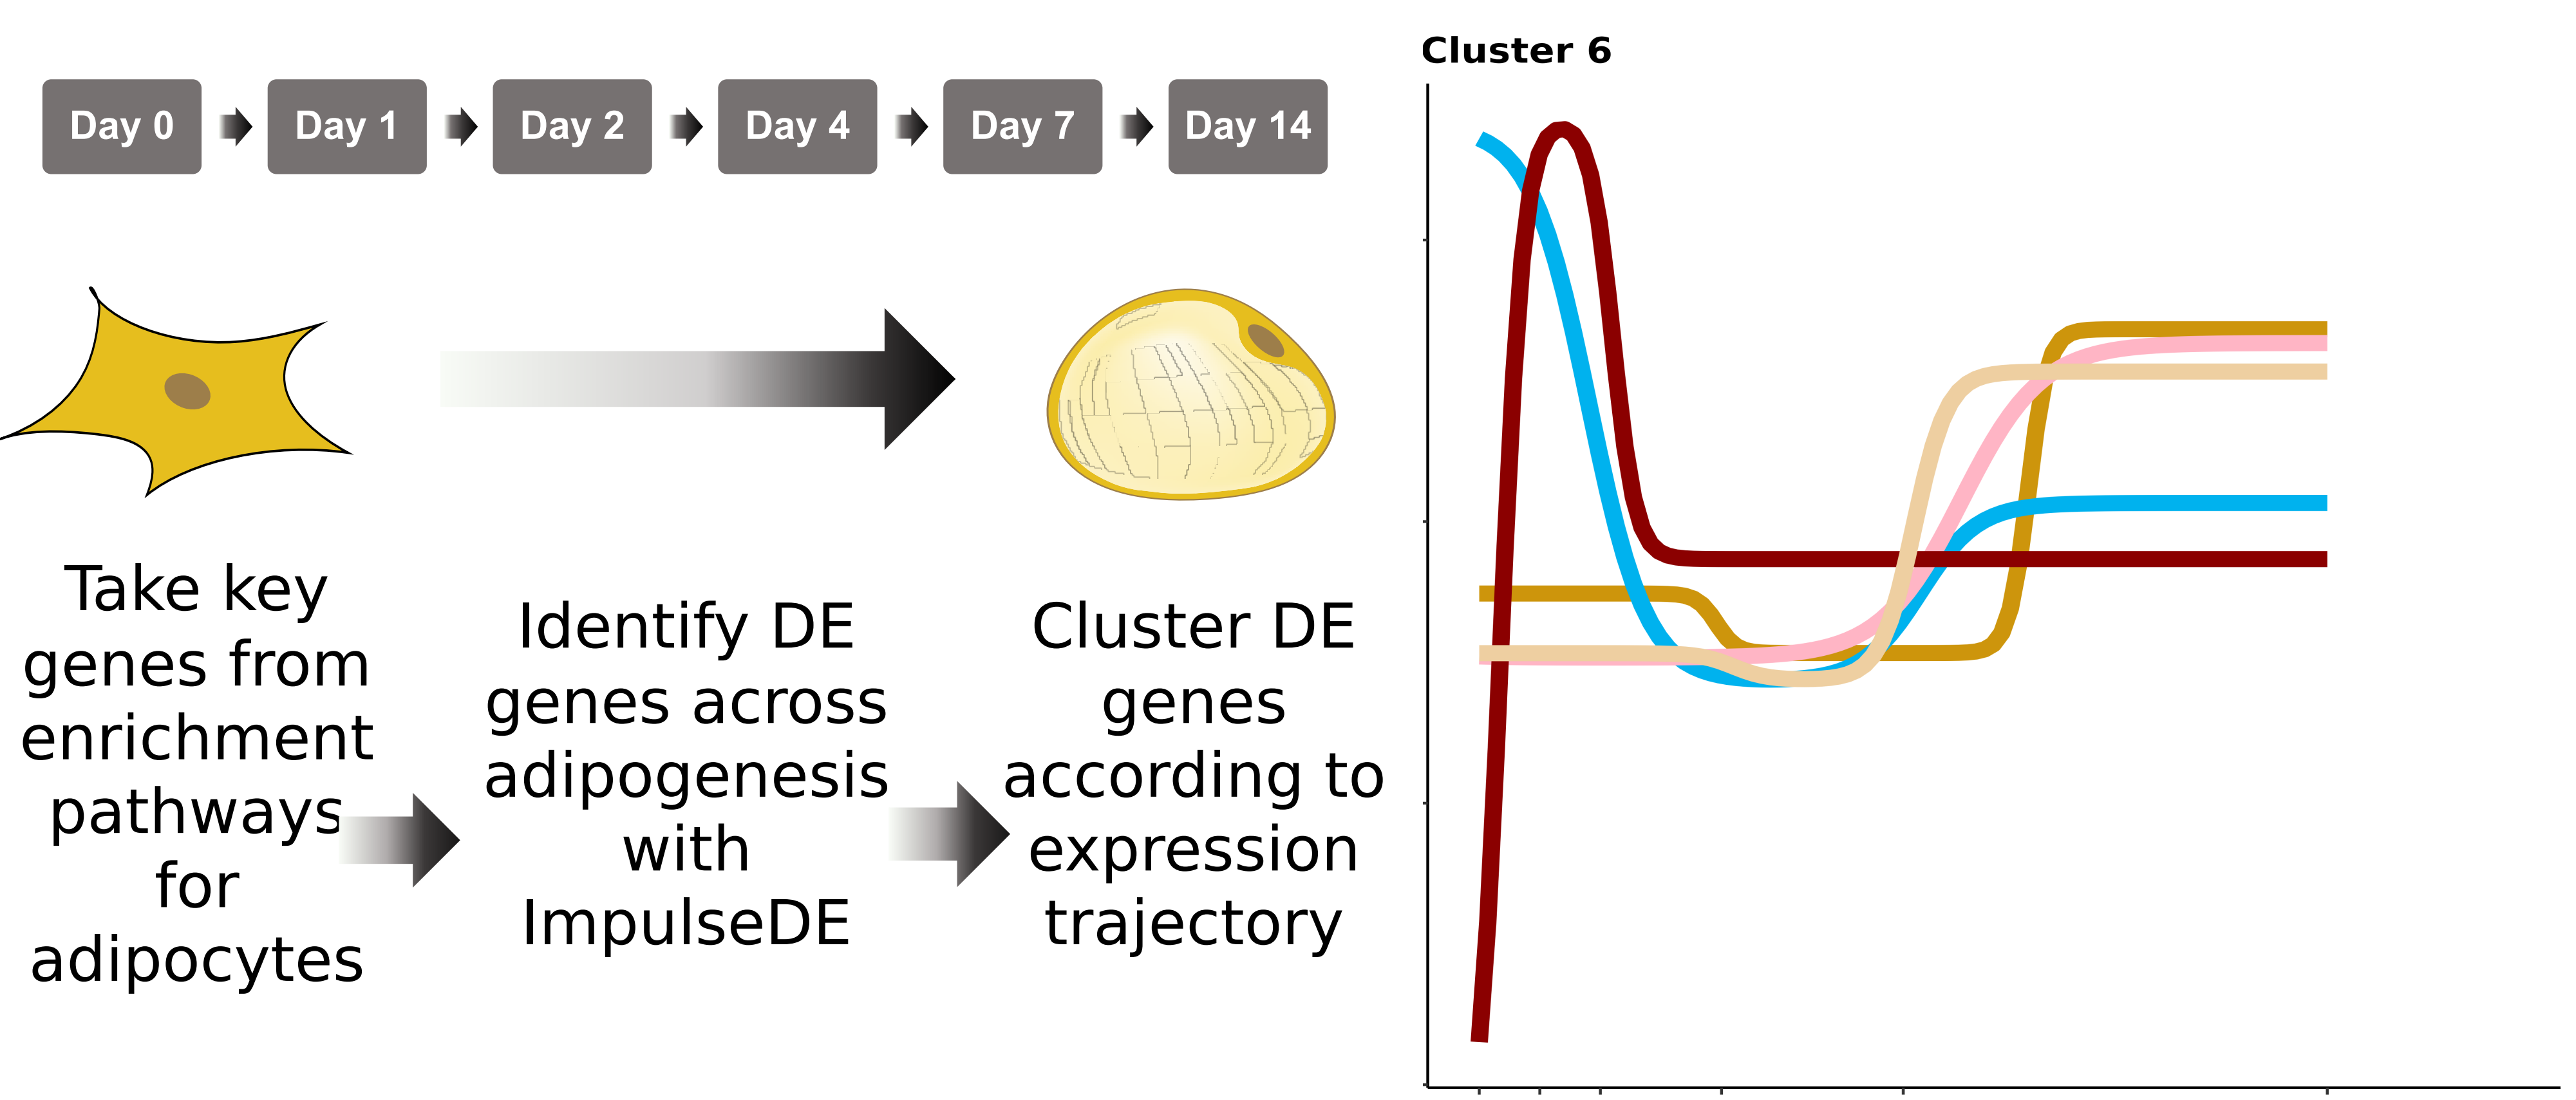

**6** Identification of SAT adipocyte marker genes down/upregulated by the risk allele carrier status of the WHRadjBMI GWAS SNPs

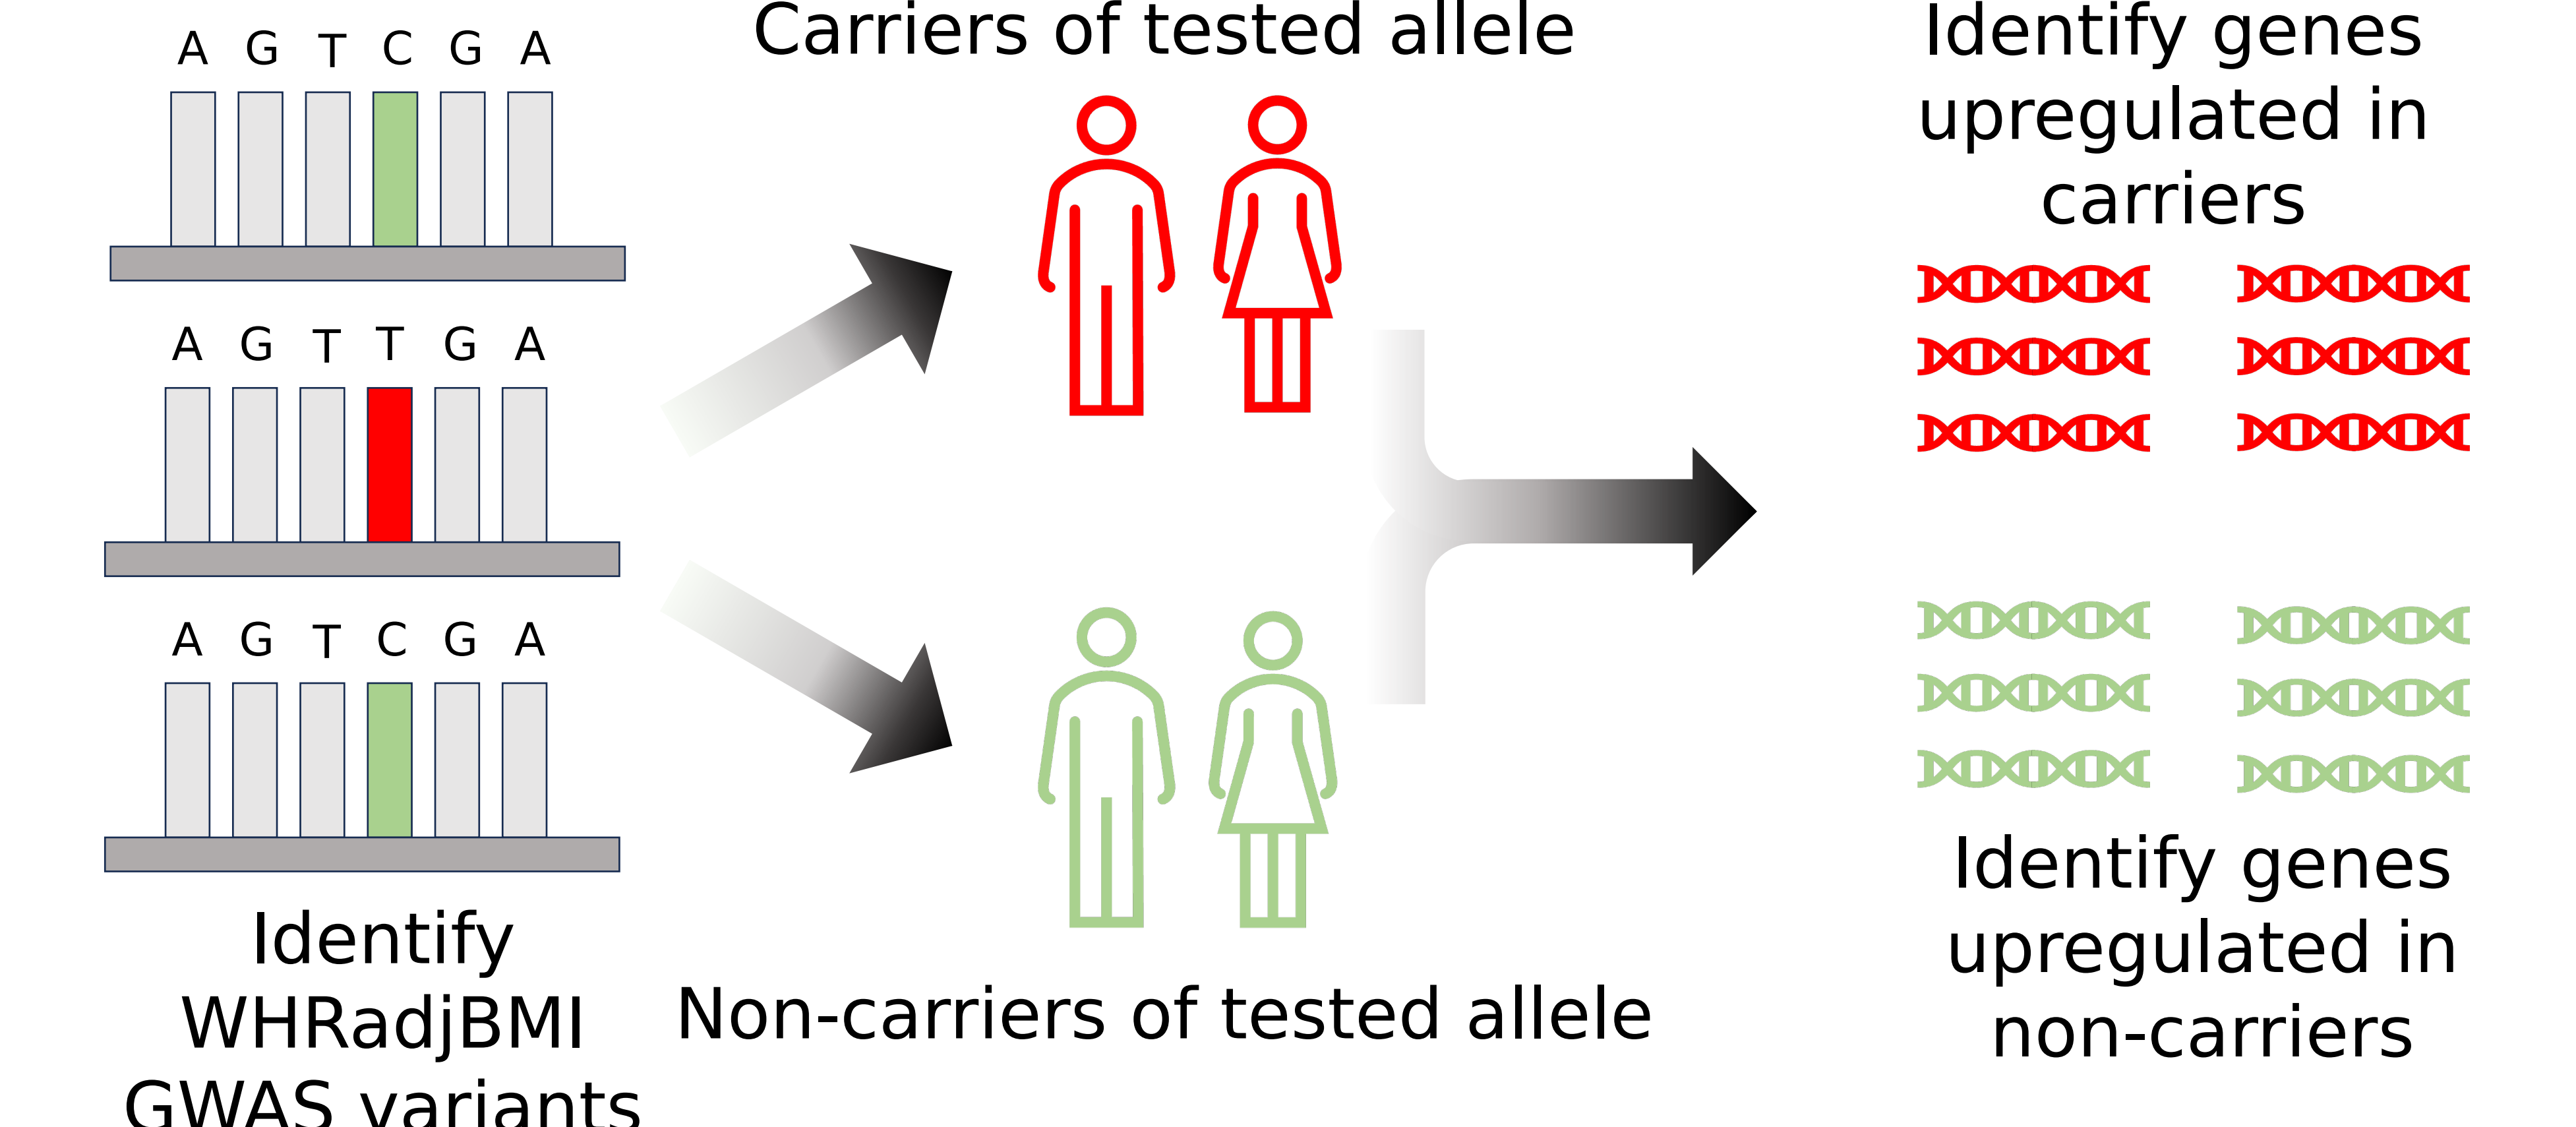

**7** Determine variance explained of abdominal obesity using PRSs of open chromatin SNPs in *cis* regions of down/upregulated *trans* genes

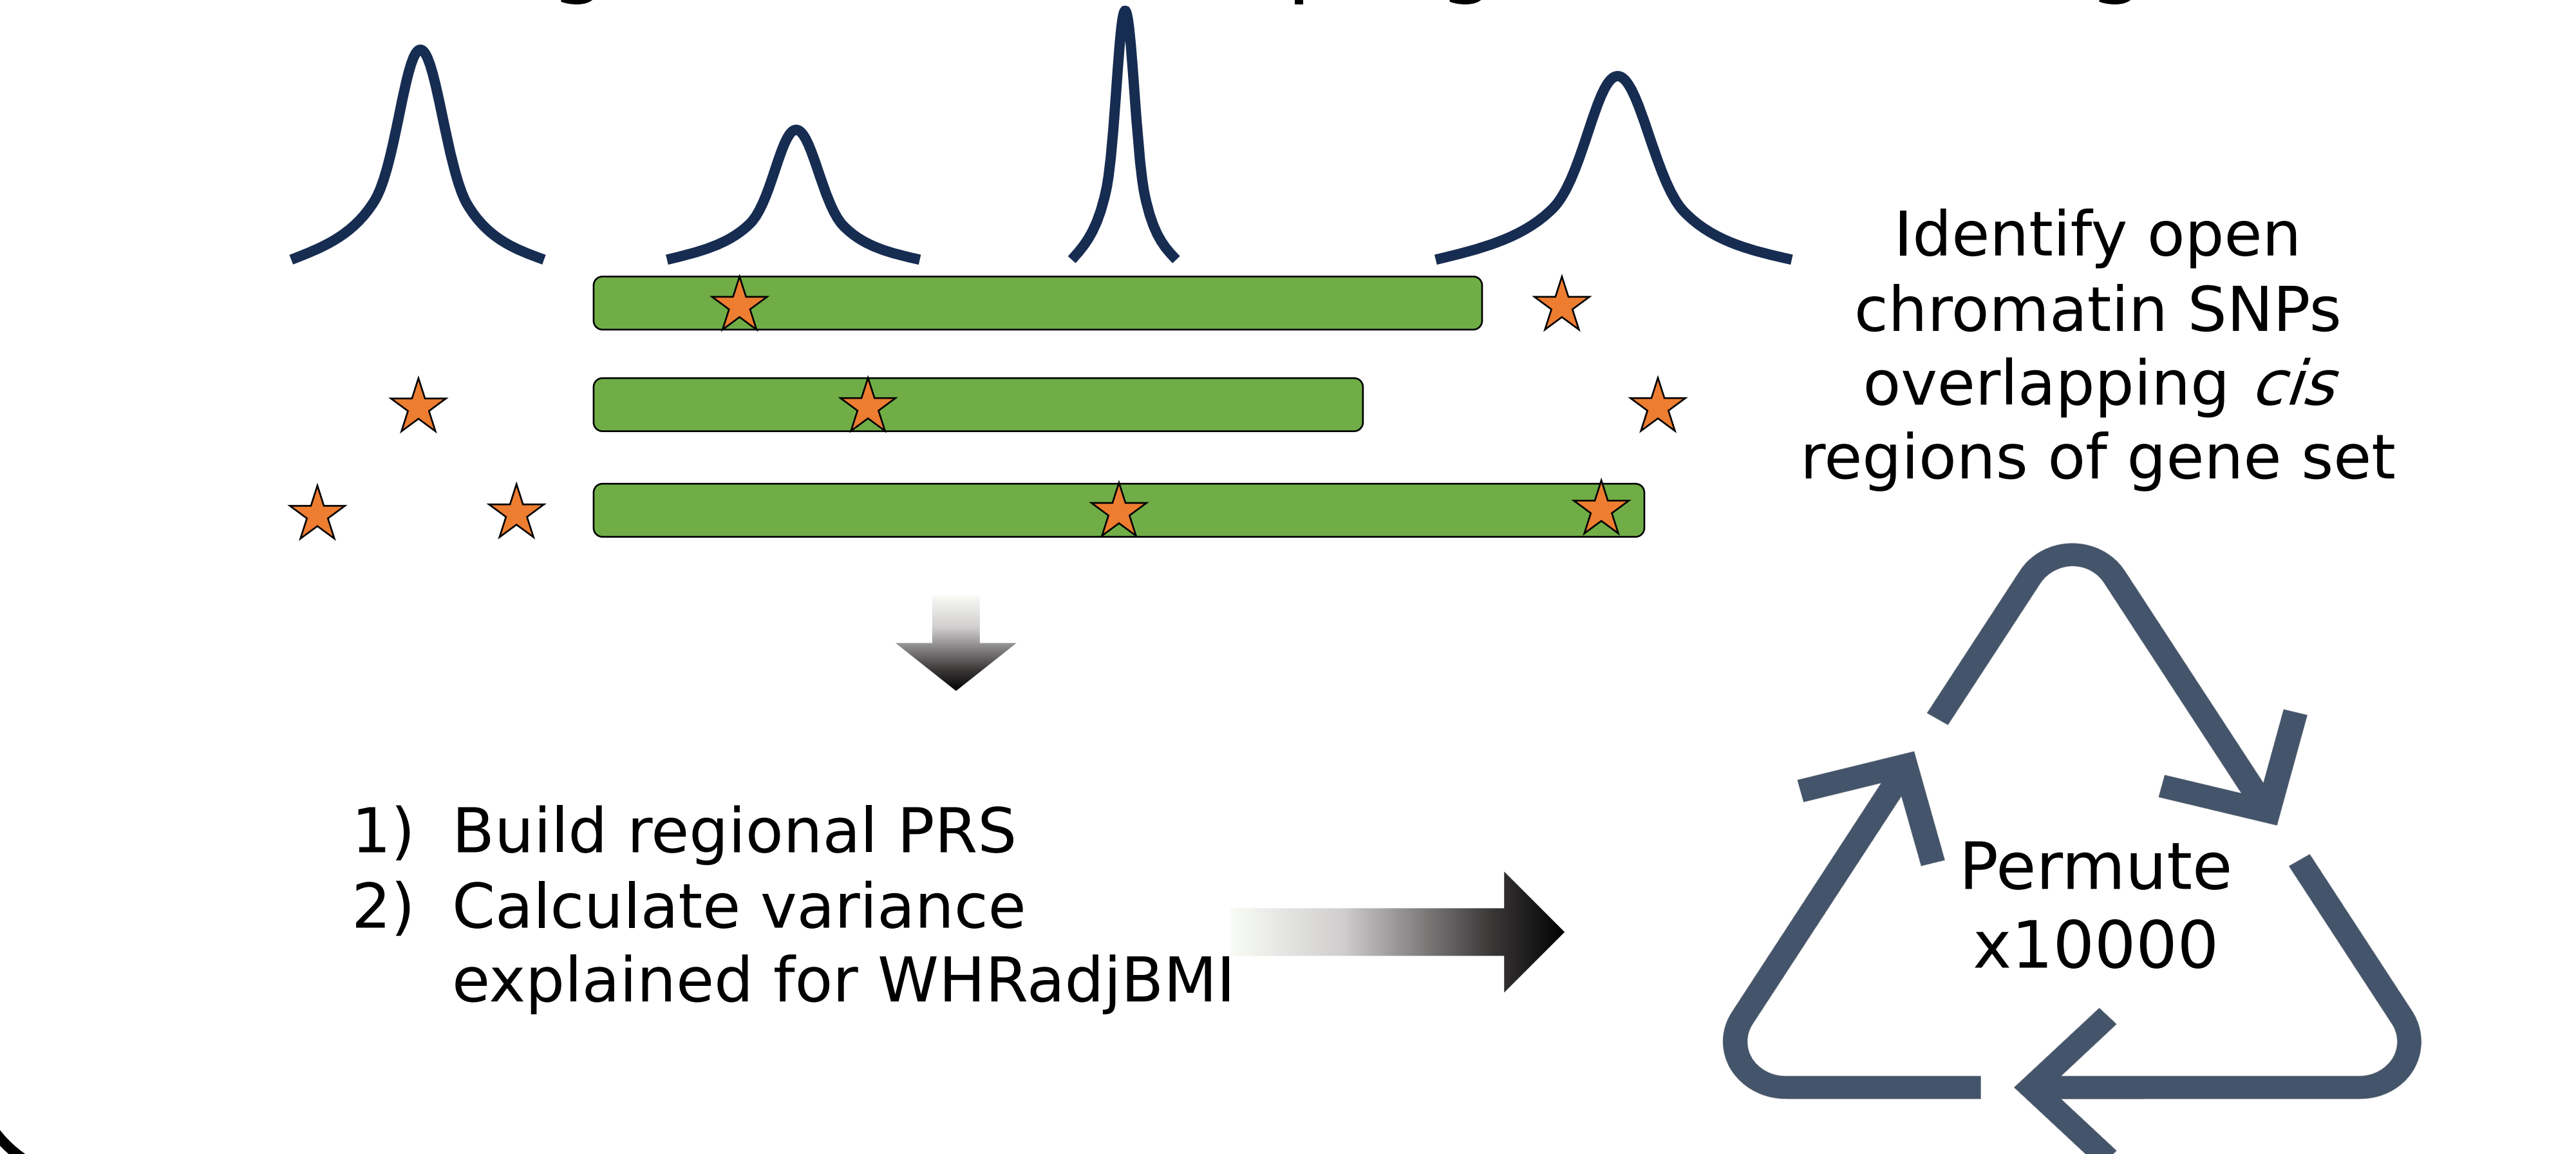

**8** Identify differences in individual level PRS scores between risk allele carrier status

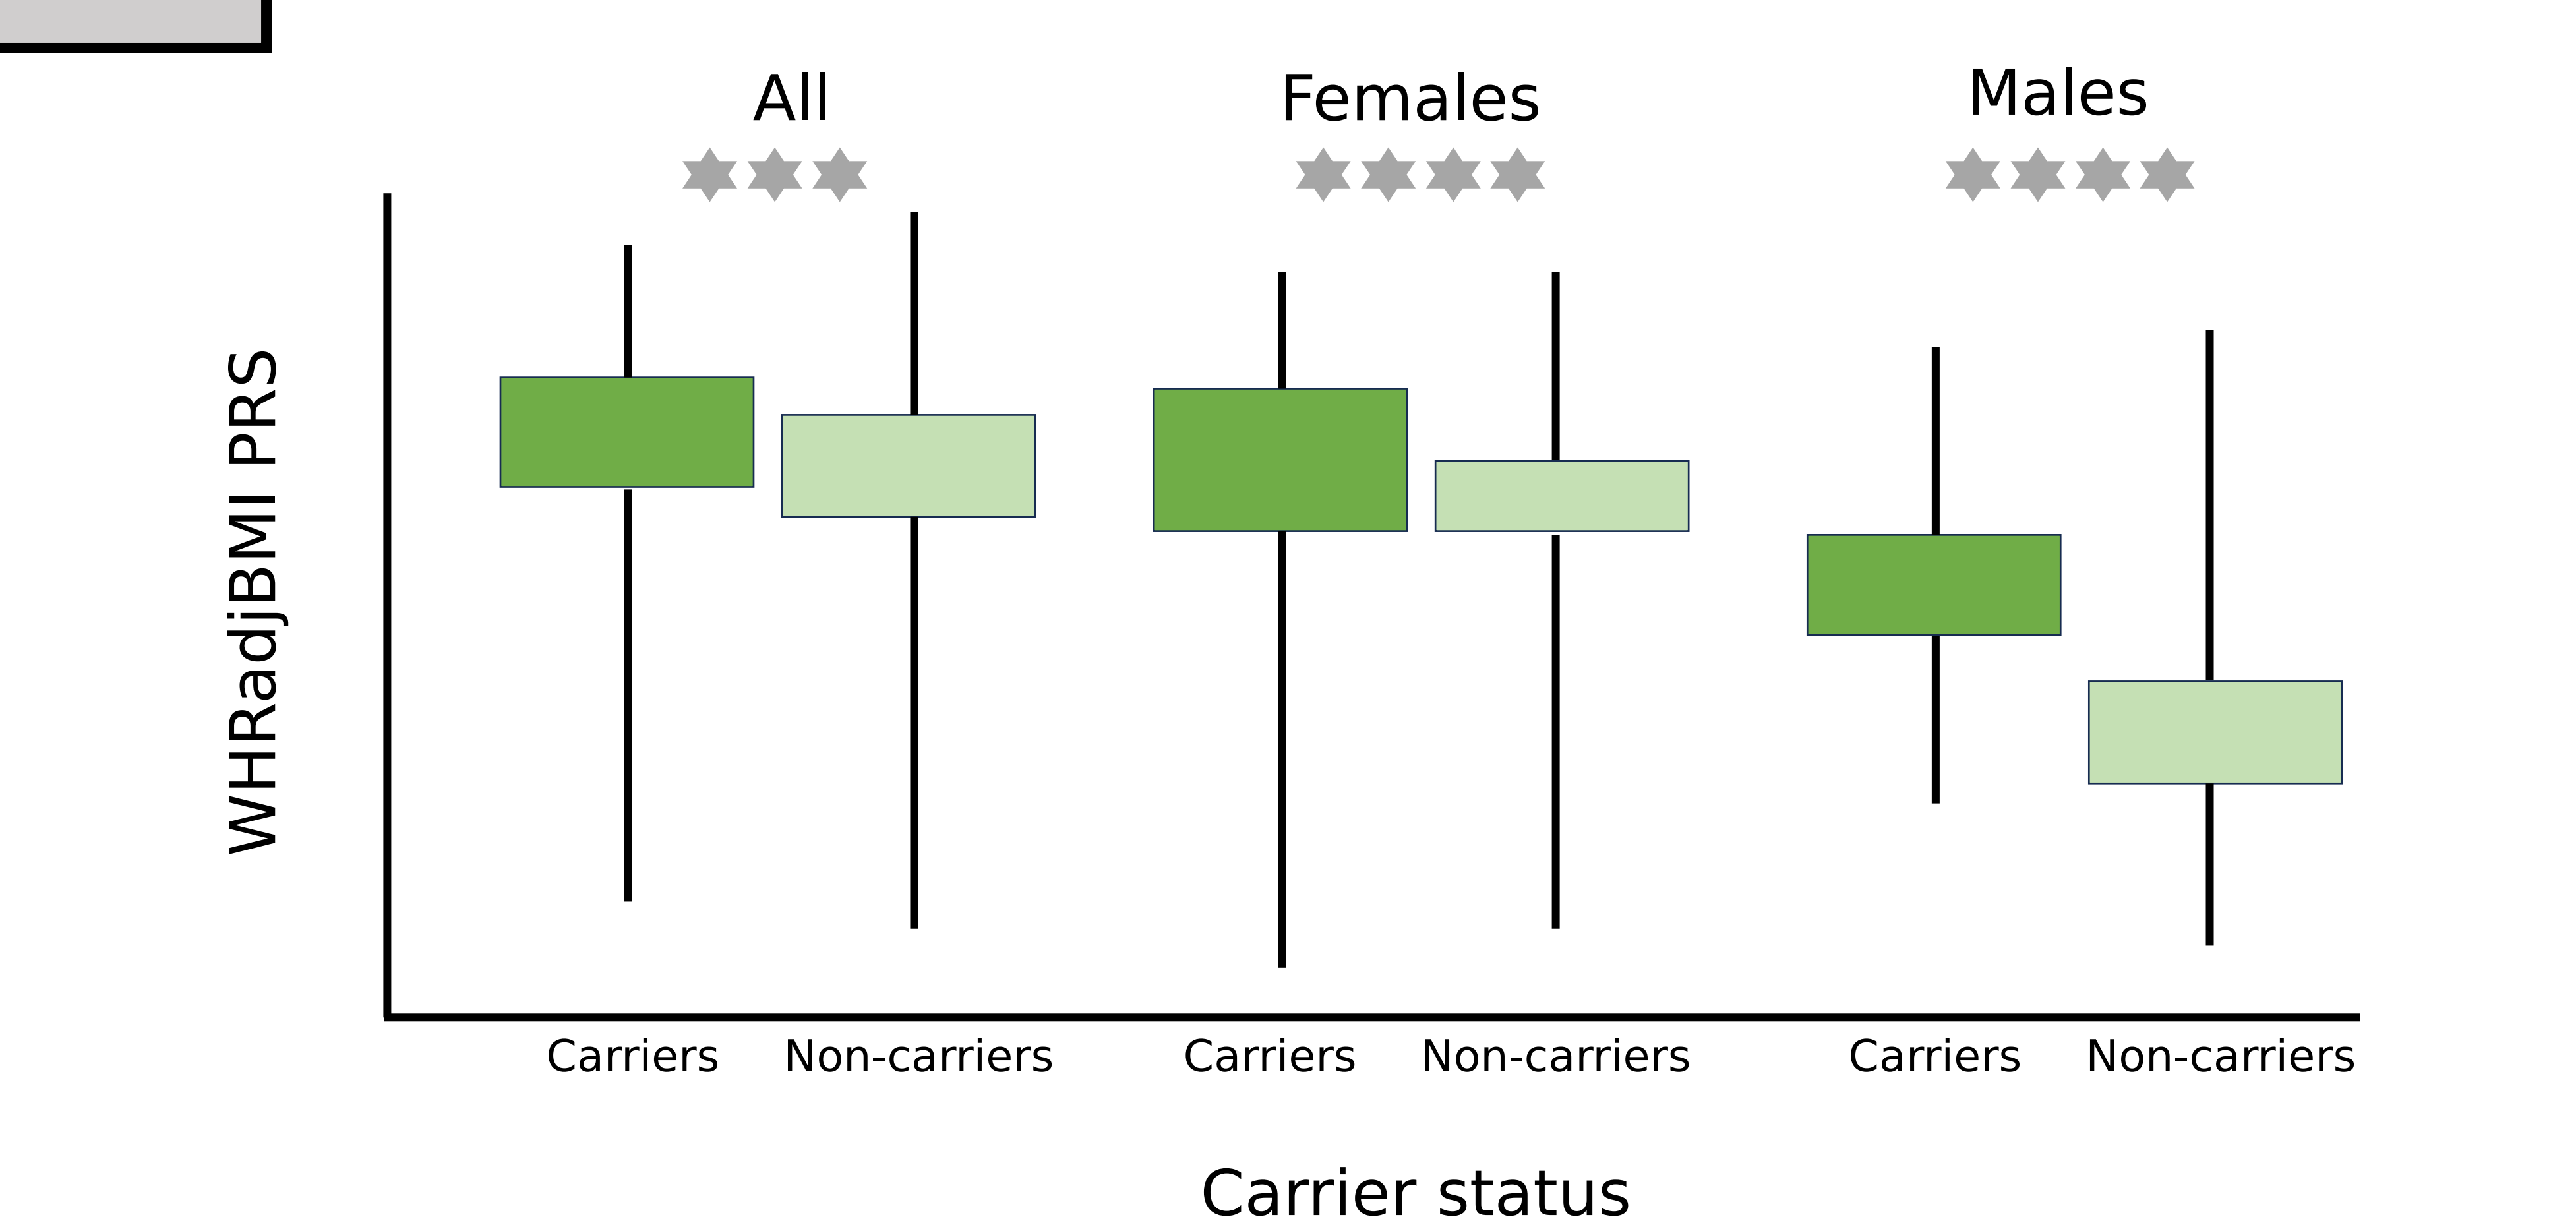

Supplement: Supplementary file [file media-1.pdf]
